# Supplementary material for: Aroma Perception of Rose Oxide, Linalool and α-Terpineol Combinations in Gewürztraminer Wine
Source: MDPI journal article supplement (doi:10.3390/fermentation8010030), 2022-01-13
Supplement: s1 [file s1]

**Table S1.** Final concentration of aroma compounds found in the wine base.

| Compounds                                 | CAS #      | ug/L <sup>a</sup> | References |
|-------------------------------------------|------------|-------------------|------------|
| Acetaldehyde                              | 75-07-0    | 60800.00          | [1]        |
| Diacteyl                                  | 431-03     | 6.00              | [1]        |
| Hexanol                                   | 111-27-3   | 1701.71           | [1][2][3]  |
| Methionol/3-Methylthiol-1-propianol       | 505-10-2   | 44.00             | [3]        |
| Butanoic acid/Butyric acid                | 156-54-7   | 736.50            | [1][3]     |
| Decanoic acid                             | 334-38-5   | 1331.00           | [3]        |
| Isobutyl acetate                          | 110-190-0  | 42.48             | [1][2]     |
| Phenethyl Acetate                         | 101-97-3   | 374.29            | [1][2][3]  |
| Ethyl 3-methylbutanoate/ethyl isovalerate | 108-64-5   | 2.25              | [1][2][3]  |
| Ethyl 2-methylbutanoate/Butyrate          | 7,452-79-1 | 1.53              | [1][2]     |
| Ethyl butanoate                           | 105-54-4   | 427.33            | [1][2]     |
| Ethyl decanoate                           | 110-38-3   | 336.00            | [1][2][3]  |
| Ethyl hexanoate                           | 123-66-0   | 747.29            | [1][2][3]  |
| Ethyl octanoate                           | 106-32-1   | 851.29            | [1][2][3]  |
| Hexanoic acid                             | 142-62-1   | 2874.00           | [1][2][3]  |
| Octanoic acid                             | 124-07-2   | 3601.71           | [1][2][3]  |
| Isobutanol/Isobutyl alcohol               | 78-83-1    | 25.00             | [1][2]     |
| Ethyl acetate                             | 141-78-6   | 35.17             | [1][2]     |
| Isoamyl acetate                           | 123-92-2   | 876.80            | [1][2][3]  |
| Phenethyl alcohol                         | 60-12-8    | 15345.00          | [1][3]     |

<sup>a</sup> The concentration was made with the average of references

[1] (Lukić et al., 2016) [2] (Zhou, 2017) [3] (Vilanova de la Torre et al., 2013)

**Table S2.** Multiple pairwise comparisons using the Critical difference (Sheskin) procedure.

| Sample Relative Frequency |       | Groups |   |   |   |
|---------------------------|-------|--------|---|---|---|
| Lavender                  | 0.060 | A      |   |   |   |
| Lime                      | 0.068 | A      |   |   |   |
| Ginger                    | 0.072 | A      |   |   |   |
| Grass                     | 0.076 | A      |   |   |   |
| Allspice                  | 0.100 | A      |   |   |   |
| Lychee                    | 0.112 | A      |   |   |   |
| Passionfruit              | 0.120 | A      |   |   |   |
| Orange                    | 0.120 | A      |   |   |   |
| Jasmine                   | 0.120 | A      |   |   |   |
| Lemon                     | 0.124 | A      | B |   |   |
| Nutty                     | 0.132 | A      | B |   |   |
| Mango                     | 0.136 | A      | B |   |   |
| Grapefruit                | 0.144 | A      | B |   |   |
| Guava                     | 0.148 | A      | B | C |   |
| Honeysuckle               | 0.152 | A      | B | C |   |
| Melon                     | 0.164 | A      | B | C |   |
| Rose                      | 0.168 | A      | B | C |   |
| Pineapple                 | 0.180 | A      | B | C |   |
| Pome fruit                | 0.244 |        | B | C | D |
| Stone fruit               | 0.268 |        |   | C | D |
| Honey                     | 0.332 |        |   |   | D |
| Dried fruit               | 0.360 |        |   |   | D |

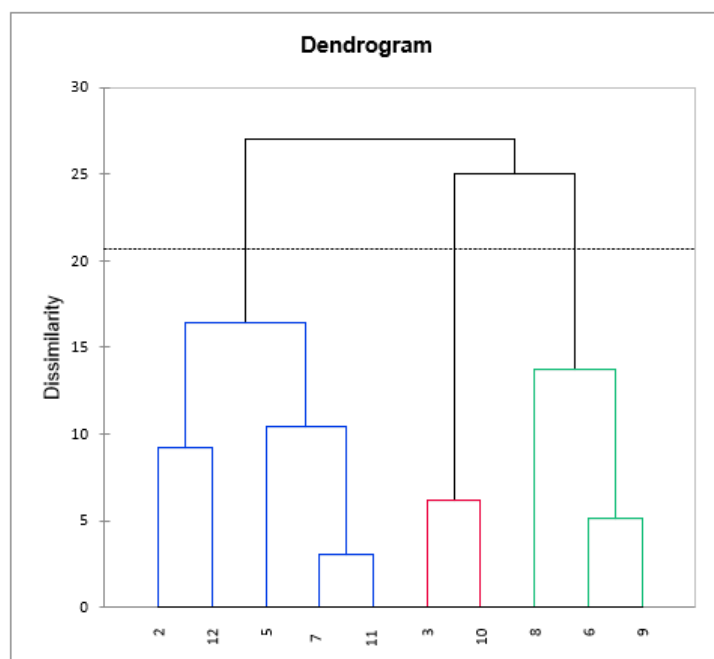

**Figure S1.** Differentiation of the wine models in dendrogram of AHC.

## References

- 1) Lukić, I.; Radeka, S; Grozaj, N; Staver, M; Peršurić, Đ. Changes in physico-chemical and volatile aroma compound composition of Gewürztraminer wine as a result of late and ice harvest. *Food chemistry*, **2016**, 196, 1048-1057.
- 2) Zhou, Q. Development of New Analytical Methods for Aroma Analysis and Investigation of Impact of Native Yeasts on Wine Aroma. Doctoral dissertation, Oregon State University, Oregon, June 2017
- 3) Vilanova de la Torre, M. D. M; Genisheva, Z; Graña, M; Oliveira, J. M; Determination of Odorants in Varietal Wines from International Grape Cultivars (*Vitis vinifera*) Grown in NW Spain. **2013**. 34(2), 212-222
